# Supplementary material for: Complement factor D (adipsin) mediates pressure-pain hypersensitivity post destabilization of medial meniscus injury
Source: bioRxiv preprint, doi:10.1101/2025.05.29.656852, version 1 (2025-06-01)
Supplement: Supplemental Information [file 656852_file03.docx]

**Supplementary Information for**

Complement factor D (adipsin) mediates pressure-pain hypersensitivity post destabilization of medial meniscus injury

Priscilla M. Tjandra1, Bethany A. Andoko1, Jooyoung A. Kim1, Andreana G. Gomez1,2, Sonya Sar1, Megha R. Aepala1,3, Tiffany T.K. Pham1, Darren Dumlao4,

Hope D. Welhaven1, Kelsey H. Collins1,5

**Correspondence to:**

Kelsey H. Collins

Department of Orthopaedic Surgery, University of California San Francisco
San Francisco, CA 94143
kelsey.collins@ucsf.edu

**This PDF file includes:**

Supplementary Tables S1-S2
 Supplementary Figures S1-S7

**Supplemental Information**

**Supplementary Table 1. Negative Mode**

| **Compound ID** | **Q1** | **Q3** | **Edit Dwell** | **Dwell Time** | **EP** | **CE** | **CXP** | **Expected RT (min)** | **RT Tolerance (s)** |
| --- | --- | --- | --- | --- | --- | --- | --- | --- | --- |
| PGE2-d4 (355/193) | 355.2 | 193.1 | 1 | 1 | 10 | 25 | 12 | 8.1 | 30 |
| 15-deoxy-PGJ2-d4 (319/275) | 319.2 | 275.1 | 1 | 1 | 10 | 20 | 12 | 13.6 | 30 |
| 8-iso-PGF2a-d4 (357/197) | 357.2 | 197.1 | 1 | 1 | 10 | 30 | 12 | 7.2 | 30 |
| LTB4-d4 (339/197) | 339.2 | 197.1 | 1 | 1 | 10 | 22 | 12 | 12.1 | 30 |
| LXA4-d5 (356/115) | 356.2 | 115.1 | 1 | 1 | 10 | 19 | 12 | 8.9 | 30 |
| 11,12-EET-d11 (327/171) | 327.2 | 171.1 | 1 | 1 | 10 | 20 | 12 | 16.5 | 30 |
| 5-HETE-d8 (327/116) | 327.2 | 116.1 | 1 | 1 | 10 | 17 | 12 | 15.9 | 30 |
| 12-HETE-d8 (327/184) | 327.2 | 184.1 | 1 | 1 | 10 | 20 | 12 | 15.6 | 30 |
| 15-HETE-d8 (327/226) | 327.2 | 226.1 | 1 | 1 | 10 | 20 | 12 | 15.3 | 30 |
| RvE1-d4 (353/197) | 353.2 | 197.1 | 1 | 1 | 10 | 22 | 12 | 5.9 | 30 |
| RvD2-d5 (380/141) | 380.2 | 141.1 | 1 | 1 | 10 | 23 | 12 | 8.7 | 30 |
| RvD3-d5 (380/152) | 380.2 | 152.1 | 1 | 1 | 10 | 25 | 12 | 8.6 | 30 |
| Maresin 1-d5 (364/221) | 364.2 | 221.1 | 1 | 1 | 10 | 20 | 12 | 12.1 | 30 |
| 6k-PGF1a (369/163) | 369.2 | 163.1 | 1 | 1 | 10 | 35 | 12 | 6.8 | 30 |
| PGE2 and PGD2 (351/189) | 351.2 | 189.1 | 1 | 1 | 10 | 25 | 12 | 8.15 | 30 |
| PGE2 (351/175) | 351.2 | 175.1 | 1 | 1 | 10 | 25 | 12 | 8.06 | 30 |
| 15-keto-PGE2 (349/113) | 349.2 | 113.1 | 1 | 1 | 10 | 28 | 12 | 7.4 | 30 |
| 13,14-dihydro-15-keto PGE2 (351/175) | 351.2 | 175.1 | 1 | 1 | 10 | 26 | 12 | 8.1 | 30 |
| PGD2 (351/233) | 351.2 | 233.1 | 1 | 1 | 10 | 16 | 12 | 8.22 | 30 |
| 11-beta-PGF2a (353/193) | 353.2 | 193.1 | 1 | 1 | 10 | 30 | 12 | 7.5 | 30 |
| 13,14-dihydro-15-keto PGD2 (351/207) | 351.2 | 207.1 | 1 | 1 | 10 | 26 | 12 | 8.8 | 30 |
| PGJ2 (333/271) | 333.2 | 271.1 | 1 | 1 | 10 | 22 | 12 | 10.1 | 30 |
| 15-deoxy-PGJ2 (315/271) | 315.2 | 271.1 | 1 | 1 | 10 | 20 | 12 | 13.6 | 30 |
| PGF2a (353/193) | 353.2 | 193.1 | 1 | 1 | 10 | 34 | 12 | 8.55 | 30 |
| 15-keto PGF2a (351/113) | 351.2 | 113.1 | 1 | 1 | 10 | 35 | 12 | 8 | 30 |
| 13,14-dihydro-15-keto PGF2a (353/291) | 353.2 | 291.1 | 1 | 1 | 10 | 25 | 12 | 9.1 | 30 |
| 20-OH PGF2a (369/193) | 369.2 | 193 | 1 | 1 | 10 | 35 | 12 | 3.22 | 30 |
| TXB2 (369/169) | 369.2 | 169.1 | 1 | 1 | 10 | 22 | 12 | 7.7 | 30 |
| 12-HHT (279/179) | 279.2 | 179.1 | 1 | 1 | 10 | 22 | 12 | 13 | 30 |
| LTB4 (335/195) | 335.2 | 195.1 | 1 | 1 | 10 | 22 | 12 | 12.1 | 30 |
| 20-OH-LTB4 (351/195) | 351.2 | 195.1 | 1 | 1 | 10 | 24 | 12 | 6.6 | 30 |
| 20-COOH-LTB4 (365/195) | 365.1 | 195.1 | 1 | 1 | 10 | 25 | 12 | 6.16 | 30 |
| LXA4 (351/115) | 351.2 | 115.1 | 1 | 1 | 10 | 20 | 12 | 8.9 | 30 |
| 15(R)-LXA4 (351/115) | 351.2 | 115.1 | 1 | 1 | 10 | 20 | 12 | 9.1 | 30 |
| LXB4 (351/221) | 351.2 | 221.1 | 1 | 1 | 10 | 22 | 12 | 8.4 | 30 |
| 5,15-diHETE (335/115) | 335.2 | 115.1 | 1 | 1 | 10 | 22 | 12 | 11.7 | 30 |
| 5S,6R-diHETE (335/115) | 335.2 | 115.1 | 1 | 1 | 10 | 20 | 12 | 13.6 | 30 |
| 5,6 EET (319/191) | 319.2 | 191.1 | 1 | 1 | 10 | 21 | 12 | 16.7 | 30 |
| 8,9 EET (319/155) | 319.2 | 155.1 | 1 | 1 | 10 | 21 | 12 | 16.6 | 30 |
| 11,12 EET (319/167) | 319.2 | 167.1 | 1 | 1 | 10 | 21 | 12 | 16.5 | 30 |
| 14,15 EET (319/219) | 319.2 | 219.1 | 1 | 1 | 10 | 15 | 12 | 16.2 | 30 |
| 5,6 DiHETrE (337/145) | 337.2 | 145.1 | 1 | 1 | 10 | 25 | 12 | 14.4 | 30 |
| 8,9 DiHETrE (337/127) | 337.2 | 127.1 | 1 | 1 | 10 | 30 | 12 | 13.9 | 30 |
| 11,12 DiHETrE (337/167) | 337.2 | 167.1 | 1 | 1 | 10 | 25 | 12 | 13.6 | 30 |
| 14,15 DiHETrE (337/207) | 337.2 | 207.1 | 1 | 1 | 10 | 25 | 12 | 13.4 | 30 |
| 5-HETE (319/115) | 319.2 | 115.1 | 1 | 1 | 10 | 21 | 12 | 15.9 | 30 |
| 9-HETE (319/167) | 319.3 | 167.2 | 1 | 1 | 10 | 21 | 12 | 15.8 | 30 |
| 11-HETE (319/167) | 319.2 | 167.1 | 1 | 1 | 10 | 21 | 12 | 15.4 | 30 |
| 12-HETE (319/179) | 319.2 | 179.1 | 1 | 1 | 10 | 21 | 12 | 15.6 | 30 |
| 15-HETE (319/219) | 319.2 | 219.1 | 1 | 1 | 10 | 19 | 12 | 15.3 | 30 |
| 18-HETE (319/261) | 319.2 | 261.2 | 1 | 1 | 10 | 25 | 12 | 14.74 | 30 |
| 20-HETE (319/289) | 319.2 | 289.1 | 1 | 1 | 10 | 25 | 12 | 14.7 | 30 |
| 8-iso-PGF2a (353/193) | 353.2 | 193.1 | 1 | 1 | 10 | 30 | 12 | 7.2 | 30 |
| AA (303/259) | 303.2 | 259.1 | 1 | 1 | 10 | 16 | 12 | 17.8 | 30 |
| RvE1 (349/195) | 349.2 | 195.1 | 1 | 1 | 10 | 22 | 12 | 5.9 | 30 |
| RvE2 (333/199) | 333.2 | 199.1 | 1 | 1 | 10 | 22 | 12 | 10.1 | 30 |
| RvE2(333/115) | 333.2 | 115.1 | 1 | 1 | 10 | 22 | 12 | 10.1 | 30 |
| 5,15-DiHEPE (333/115) | 333.2 | 115.1 | 1 | 1 | 10 | 22 | 12 | 10.5 | 30 |
| RvE3 (333/201) | 333.2 | 201.1 | 1 | 1 | 10 | 20 | 12 | 12 | 30 |
| LXA5 (349/115) | 349.2 | 115.1 | 1 | 1 | 10 | 20 | 12 | 7.5 | 30 |
| 5-HEPE (317/115) | 317.2 | 115.1 | 1 | 1 | 10 | 19 | 12 | 14.6 | 30 |
| 11-HEPE (317/167) | 317.2 | 167.1 | 1 | 1 | 10 | 19 | 12 | 14.3 | 30 |
| 12-HEPE (317/179) | 317.2 | 179.1 | 1 | 1 | 10 | 19 | 12 | 14.4 | 30 |
| 15-HEPE (317/219) | 317.2 | 219.1 | 1 | 1 | 10 | 18 | 12 | 14.3 | 30 |
| 18-HEPE (317/259) | 317.2 | 259.1 | 1 | 1 | 10 | 16 | 12 | 14.1 | 30 |
| 8,9-EpETE (317/127) | 317.2 | 127.1 | 1 | 1 | 10 | 20 | 12 | 15.4 | 30 |
| 11,12-EpETE (317/167) | 317.2 | 167.1 | 1 | 1 | 10 | 20 | 12 | 15.4 | 30 |
| 14,15-EpETE (317/207) | 317.2 | 207.1 | 1 | 1 | 10 | 20 | 12 | 15.4 | 30 |
| 17,18-EpETE (317/215) | 317.2 | 215.1 | 1 | 1 | 10 | 20 | 12 | 15.1 | 30 |
| EPA (301/257) | 301.2 | 257.1 | 1 | 1 | 10 | 16 | 12 | 17.7 | 30 |
| RvD1 (375/141) | 375.2 | 141.1 | 1 | 1 | 10 | 21 | 12 | 9.1 | 30 |

**Supplementary Table 1. Continued**

| **Compound ID** | **Q1** | **Q3** | **Edit Dwell** | **Dwell Time** | **EP** | **CE** | **CXP** | **Expected RT (min)** | **RT Tolerance (s)** |
| --- | --- | --- | --- | --- | --- | --- | --- | --- | --- |
| 17(R)-RvD1 (375/141) | 375.2 | 141.1 | 1 | 1 | 10 | 21 | 12 | 9.3 | 30 |
| RvD2 (375/175) | 375.2 | 175.1 | 1 | 1 | 10 | 30 | 12 | 8.7 | 30 |
| RvD3 (375/147) | 375.2 | 147.1 | 1 | 1 | 10 | 25 | 12 | 8.7 | 30 |
| 17(R)-RvD3 (375/147) | 375.2 | 147.1 | 1 | 1 | 10 | 25 | 12 | 8.5 | 30 |
| RvD4 (375/101) | 375.2 | 101.1 | 1 | 1 | 10 | 22 | 12 | 10 | 30 |
| RvD5 (359/199) | 359.2 | 199.1 | 1 | 1 | 10 | 21 | 12 | 11.9 | 30 |
| PD1 (359/153) | 359.2 | 153.1 | 1 | 1 | 10 | 21 | 12 | 12.1 | 30 |
| PDX (359/153) | 359.2 | 153.1 | 1 | 1 | 10 | 21 | 12 | 11.9 | 30 |
| Maresin 1 (359/221) | 359.2 | 221.1 | 1 | 1 | 10 | 20 | 12 | 12.1 | 30 |
| Maresin 1 (359/250) | 359.2 | 250.1 | 1 | 1 | 10 | 20 | 12 | 12.1 | 30 |
| Maresin 2 (359/221) | 359.2 | 221.1 | 1 | 1 | 10 | 20 | 12 | 13.1 | 30 |
| 4-HDHA (343/101) | 343.2 | 101.1 | 1 | 1 | 10 | 17 | 12 | 16.3 | 30 |
| 7-HDHA (343/141) | 343.2 | 141.1 | 1 | 1 | 10 | 18 | 12 | 15.8 | 30 |
| 13-HDHA (343/193) | 343.2 | 193.1 | 1 | 1 | 10 | 17 | 12 | 15.6 | 30 |
| 14-HDHA (343/205) | 343.2 | 205.1 | 1 | 1 | 10 | 17 | 12 | 15.7 | 30 |
| 16-HDHA (343/233) | 343.2 | 233.1 | 1 | 1 | 10 | 20 | 12 | 15.4 | 30 |
| 17-HDHA (343/245) | 343.2 | 245.1 | 1 | 1 | 10 | 17 | 12 | 15.5 | 30 |
| 7,8-EpDPA (343/113) | 343.2 | 113.1 | 1 | 1 | 10 | 20 | 12 | 16.8 | 30 |
| 10,11-EpDPA (343/153) | 343.2 | 153.2 | 1 | 1 | 10 | 20 | 12 | 16.6 | 30 |
| 13,14-EpDPA (343/161) | 343.2 | 161.1 | 1 | 1 | 10 | 20 | 12 | 16.58 | 30 |
| 16,17-EpDPA (343/274) | 343.2 | 274.1 | 1 | 1 | 10 | 20 | 12 | 16.55 | 30 |
| 19,20-EpDPA (343/241) | 343.2 | 241.1 | 1 | 1 | 10 | 20 | 12 | 16.3 | 30 |
| DHA (327/283) | 327.2 | 283.1 | 1 | 1 | 10 | 18 | 12 | 17.8 | 30 |
| DPA (329/285) | 329.2 | 285.1 | 1 | 1 | 10 | 18 | 12 | 17.9 | 30 |
| Adrenic Acid (331/287) | 331.2 | 287.1 | 1 | 1 | 10 | 18 | 12 | 18 | 30 |
| 9-HODE (295/171) | 295.2 | 171.1 | 1 | 1 | 10 | 25 | 12 | 15 | 30 |
| 13-HODE (295/195) | 295.2 | 195.1 | 1 | 1 | 10 | 25 | 12 | 15.02 | 30 |
| 13-OxoODE (13-KODE) (293/113) | 293.2 | 113.2 | 1 | 1 | 10 | 30 | 12 | 14.84 | 30 |
| 12(13)-EpOME (295/195 | 295.3 | 195.2 | 1 | 1 | 10 | 25 | 12 | 16 | 30 |
| 9,10 DiHOME (313/201) | 313.3 | 201.3 | 1 | 1 | 10 | 30 | 12 | 13 | 30 |
| 10-Nitrolinoleate (324/277) | 324.2 | 277.1 | 1 | 1 | 10 | 18 | 12 | 16.7 | 30 |
| 9(S)HOTrE (293/171) | 293.3 | 171.1 | 1 | 1 | 10 | 25 | 12 | 13.74 | 30 |
| 13(S)HOTrE (293/195) | 293.2 | 195 | 1 | 1 | 10 | 25 | 12 | 13.94 | 30 |
| PAF (508/59) | 508.3 | 59.1 | 1 | 1 | 10 | 20 | 12 | 17.8 | 30 |
| PGE2-d4 (355/193) | 355.2 | 193.1 | 1 | 1 | 10 | 25 | 12 | 8.1 | 30 |
| 15-deoxy-PGJ2-d4 (319/275) | 319.2 | 275.1 | 1 | 1 | 10 | 20 | 12 | 13.6 | 30 |
| 8-iso-PGF2a-d4 (357/197) | 357.2 | 197.1 | 1 | 1 | 10 | 30 | 12 | 7.2 | 30 |
| LTB4-d4 (339/197) | 339.2 | 197.1 | 1 | 1 | 10 | 22 | 12 | 12.1 | 30 |
| LXA4-d5 (356/115) | 356.2 | 115.1 | 1 | 1 | 10 | 19 | 12 | 8.9 | 30 |
| 11,12-EET-d11 (327/171) | 327.2 | 171.1 | 1 | 1 | 10 | 20 | 12 | 16.5 | 30 |
| 5-HETE-d8 (327/116) | 327.2 | 116.1 | 1 | 1 | 10 | 17 | 12 | 15.9 | 30 |
| 12-HETE-d8 (327/184) | 327.2 | 184.1 | 1 | 1 | 10 | 20 | 12 | 15.6 | 30 |
| 15-HETE-d8 (327/226) | 327.2 | 226.1 | 1 | 1 | 10 | 20 | 12 | 15.3 | 30 |
| RvE1-d4 (353/197) | 353.2 | 197.1 | 1 | 1 | 10 | 22 | 12 | 5.9 | 30 |
| RvD2-d5 (380/141) | 380.2 | 141.1 | 1 | 1 | 10 | 23 | 12 | 8.7 | 30 |
| RvD3-d5 (380/152) | 380.2 | 152.1 | 1 | 1 | 10 | 25 | 12 | 8.6 | 30 |
| Maresin 1-d5 (364/221) | 364.2 | 221.1 | 1 | 1 | 10 | 20 | 12 | 12.1 | 30 |
| 6k-PGF1a (369/163) | 369.2 | 163.1 | 1 | 1 | 10 | 35 | 12 | 6.8 | 30 |
| PGE2 and PGD2 (351/189) | 351.2 | 189.1 | 1 | 1 | 10 | 25 | 12 | 8.15 | 30 |
| PGE2 (351/175) | 351.2 | 175.1 | 1 | 1 | 10 | 25 | 12 | 8.06 | 30 |
| 15-keto-PGE2 (349/113) | 349.2 | 113.1 | 1 | 1 | 10 | 28 | 12 | 7.4 | 30 |
| 13,14-dihydro-15-keto PGE2 (351/175) | 351.2 | 175.1 | 1 | 1 | 10 | 26 | 12 | 8.1 | 30 |
| PGD2 (351/233) | 351.2 | 233.1 | 1 | 1 | 10 | 16 | 12 | 8.22 | 30 |
| 11-beta-PGF2a (353/193) | 353.2 | 193.1 | 1 | 1 | 10 | 30 | 12 | 7.5 | 30 |
| 13,14-dihydro-15-keto PGD2 (351/207) | 351.2 | 207.1 | 1 | 1 | 10 | 26 | 12 | 8.8 | 30 |
| PGJ2 (333/271) | 333.2 | 271.1 | 1 | 1 | 10 | 22 | 12 | 10.1 | 30 |
| 15-deoxy-PGJ2 (315/271) | 315.2 | 271.1 | 1 | 1 | 10 | 20 | 12 | 13.6 | 30 |
| PGF2a (353/193) | 353.2 | 193.1 | 1 | 1 | 10 | 34 | 12 | 8.55 | 30 |
| 15-keto PGF2a (351/113) | 351.2 | 113.1 | 1 | 1 | 10 | 35 | 12 | 8 | 30 |
| 13,14-dihydro-15-keto PGF2a (353/291) | 353.2 | 291.1 | 1 | 1 | 10 | 25 | 12 | 9.1 | 30 |
| 20-OH PGF2a (369/193) | 369.2 | 193 | 1 | 1 | 10 | 35 | 12 | 3.22 | 30 |
| TXB2 (369/169) | 369.2 | 169.1 | 1 | 1 | 10 | 22 | 12 | 7.7 | 30 |
| 12-HHT (279/179) | 279.2 | 179.1 | 1 | 1 | 10 | 22 | 12 | 13 | 30 |
| LTB4 (335/195) | 335.2 | 195.1 | 1 | 1 | 10 | 22 | 12 | 12.1 | 30 |
| 20-OH-LTB4 (351/195) | 351.2 | 195.1 | 1 | 1 | 10 | 24 | 12 | 6.6 | 30 |
| 20-COOH-LTB4 (365/195) | 365.1 | 195.1 | 1 | 1 | 10 | 25 | 12 | 6.16 | 30 |
| LXA4 (351/115) | 351.2 | 115.1 | 1 | 1 | 10 | 20 | 12 | 8.9 | 30 |
| 15(R)-LXA4 (351/115) | 351.2 | 115.1 | 1 | 1 | 10 | 20 | 12 | 9.1 | 30 |
| LXB4 (351/221) | 351.2 | 221.1 | 1 | 1 | 10 | 22 | 12 | 8.4 | 30 |
| 5,15-diHETE (335/115) | 335.2 | 115.1 | 1 | 1 | 10 | 22 | 12 | 11.7 | 30 |
| 5S,6R-diHETE (335/115) | 335.2 | 115.1 | 1 | 1 | 10 | 20 | 12 | 13.6 | 30 |
| 5,6 EET (319/191) | 319.2 | 191.1 | 1 | 1 | 10 | 21 | 12 | 16.7 | 30 |
| 8,9 EET (319/155) | 319.2 | 155.1 | 1 | 1 | 10 | 21 | 12 | 16.6 | 30 |
| 11,12 EET (319/167) | 319.2 | 167.1 | 1 | 1 | 10 | 21 | 12 | 16.5 | 30 |
| 14,15 EET (319/219) | 319.2 | 219.1 | 1 | 1 | 10 | 15 | 12 | 16.2 | 30 |

**Supplementary Table 1. Continued**

| **Compound ID** | **Q1** | **Q3** | **Edit Dwell** | **Dwell Time** | **EP** | **CE** | **CXP** | **Expected RT (min)** | **RT Tolerance (s)** |
| --- | --- | --- | --- | --- | --- | --- | --- | --- | --- |
| 5,6 DiHETrE (337/145) | 337.2 | 145.1 | 1 | 1 | 10 | 25 | 12 | 14.4 | 30 |
| 8,9 DiHETrE (337/127) | 337.2 | 127.1 | 1 | 1 | 10 | 30 | 12 | 13.9 | 30 |
| 11,12 DiHETrE (337/167) | 337.2 | 167.1 | 1 | 1 | 10 | 25 | 12 | 13.6 | 30 |
| 14,15 DiHETrE (337/207) | 337.2 | 207.1 | 1 | 1 | 10 | 25 | 12 | 13.4 | 30 |
| 5-HETE (319/115) | 319.2 | 115.1 | 1 | 1 | 10 | 21 | 12 | 15.9 | 30 |
| 9-HETE (319/167) | 319.3 | 167.2 | 1 | 1 | 10 | 21 | 12 | 15.8 | 30 |
| 11-HETE (319/167) | 319.2 | 167.1 | 1 | 1 | 10 | 21 | 12 | 15.4 | 30 |
| 12-HETE (319/179) | 319.2 | 179.1 | 1 | 1 | 10 | 21 | 12 | 15.6 | 30 |
| 15-HETE (319/219) | 319.2 | 219.1 | 1 | 1 | 10 | 19 | 12 | 15.3 | 30 |
| 18-HETE (319/261) | 319.2 | 261.2 | 1 | 1 | 10 | 25 | 12 | 14.74 | 30 |
| 20-HETE (319/289) | 319.2 | 289.1 | 1 | 1 | 10 | 25 | 12 | 14.7 | 30 |
| 8-iso-PGF2a (353/193) | 353.2 | 193.1 | 1 | 1 | 10 | 30 | 12 | 7.2 | 30 |
| AA (303/259) | 303.2 | 259.1 | 1 | 1 | 10 | 16 | 12 | 17.8 | 30 |
| RvE1 (349/195) | 349.2 | 195.1 | 1 | 1 | 10 | 22 | 12 | 5.9 | 30 |
| RvE2 (333/199) | 333.2 | 199.1 | 1 | 1 | 10 | 22 | 12 | 10.1 | 30 |
| RvE2(333/115) | 333.2 | 115.1 | 1 | 1 | 10 | 22 | 12 | 10.1 | 30 |
| 5,15-DiHEPE (333/115) | 333.2 | 115.1 | 1 | 1 | 10 | 22 | 12 | 10.5 | 30 |
| RvE3 (333/201) | 333.2 | 201.1 | 1 | 1 | 10 | 20 | 12 | 12 | 30 |
| LXA5 (349/115) | 349.2 | 115.1 | 1 | 1 | 10 | 20 | 12 | 7.5 | 30 |
| 5-HEPE (317/115) | 317.2 | 115.1 | 1 | 1 | 10 | 19 | 12 | 14.6 | 30 |
| 11-HEPE (317/167) | 317.2 | 167.1 | 1 | 1 | 10 | 19 | 12 | 14.3 | 30 |
| 12-HEPE (317/179) | 317.2 | 179.1 | 1 | 1 | 10 | 19 | 12 | 14.4 | 30 |
| 15-HEPE (317/219) | 317.2 | 219.1 | 1 | 1 | 10 | 18 | 12 | 14.3 | 30 |
| 18-HEPE (317/259) | 317.2 | 259.1 | 1 | 1 | 10 | 16 | 12 | 14.1 | 30 |
| 8,9-EpETE (317/127) | 317.2 | 127.1 | 1 | 1 | 10 | 20 | 12 | 15.4 | 30 |
| 11,12-EpETE (317/167) | 317.2 | 167.1 | 1 | 1 | 10 | 20 | 12 | 15.4 | 30 |
| 14,15-EpETE (317/207) | 317.2 | 207.1 | 1 | 1 | 10 | 20 | 12 | 15.4 | 30 |
| 17,18-EpETE (317/215) | 317.2 | 215.1 | 1 | 1 | 10 | 20 | 12 | 15.1 | 30 |
| EPA (301/257) | 301.2 | 257.1 | 1 | 1 | 10 | 16 | 12 | 17.7 | 30 |
| RvD1 (375/141) | 375.2 | 141.1 | 1 | 1 | 10 | 21 | 12 | 9.1 | 30 |
| 17(R)-RvD1 (375/141) | 375.2 | 141.1 | 1 | 1 | 10 | 21 | 12 | 9.3 | 30 |
| RvD2 (375/175) | 375.2 | 175.1 | 1 | 1 | 10 | 30 | 12 | 8.7 | 30 |
| RvD3 (375/147) | 375.2 | 147.1 | 1 | 1 | 10 | 25 | 12 | 8.7 | 30 |
| 17(R)-RvD3 (375/147) | 375.2 | 147.1 | 1 | 1 | 10 | 25 | 12 | 8.5 | 30 |
| RvD4 (375/101) | 375.2 | 101.1 | 1 | 1 | 10 | 22 | 12 | 10 | 30 |
| RvD5 (359/199) | 359.2 | 199.1 | 1 | 1 | 10 | 21 | 12 | 11.9 | 30 |
| PD1 (359/153) | 359.2 | 153.1 | 1 | 1 | 10 | 21 | 12 | 12.1 | 30 |
| PDX (359/153) | 359.2 | 153.1 | 1 | 1 | 10 | 21 | 12 | 11.9 | 30 |
| Maresin 1 (359/221) | 359.2 | 221.1 | 1 | 1 | 10 | 20 | 12 | 12.1 | 30 |
| Maresin 1 (359/250) | 359.2 | 250.1 | 1 | 1 | 10 | 20 | 12 | 12.1 | 30 |
| Maresin 2 (359/221) | 359.2 | 221.1 | 1 | 1 | 10 | 20 | 12 | 13.1 | 30 |
| 4-HDHA (343/101) | 343.2 | 101.1 | 1 | 1 | 10 | 17 | 12 | 16.3 | 30 |
| 7-HDHA (343/141) | 343.2 | 141.1 | 1 | 1 | 10 | 18 | 12 | 15.8 | 30 |
| 13-HDHA (343/193) | 343.2 | 193.1 | 1 | 1 | 10 | 17 | 12 | 15.6 | 30 |
| 14-HDHA (343/205) | 343.2 | 205.1 | 1 | 1 | 10 | 17 | 12 | 15.7 | 30 |
| 16-HDHA (343/233) | 343.2 | 233.1 | 1 | 1 | 10 | 20 | 12 | 15.4 | 30 |
| 17-HDHA (343/245) | 343.2 | 245.1 | 1 | 1 | 10 | 17 | 12 | 15.5 | 30 |
| 7,8-EpDPA (343/113) | 343.2 | 113.1 | 1 | 1 | 10 | 20 | 12 | 16.8 | 30 |
| 10,11-EpDPA (343/153) | 343.2 | 153.2 | 1 | 1 | 10 | 20 | 12 | 16.6 | 30 |
| 13,14-EpDPA (343/161) | 343.2 | 161.1 | 1 | 1 | 10 | 20 | 12 | 16.58 | 30 |
| 16,17-EpDPA (343/274) | 343.2 | 274.1 | 1 | 1 | 10 | 20 | 12 | 16.55 | 30 |
| 19,20-EpDPA (343/241) | 343.2 | 241.1 | 1 | 1 | 10 | 20 | 12 | 16.3 | 30 |
| DHA (327/283) | 327.2 | 283.1 | 1 | 1 | 10 | 18 | 12 | 17.8 | 30 |
| DPA (329/285) | 329.2 | 285.1 | 1 | 1 | 10 | 18 | 12 | 17.9 | 30 |
| Adrenic Acid (331/287) | 331.2 | 287.1 | 1 | 1 | 10 | 18 | 12 | 18 | 30 |
| 9-HODE (295/171) | 295.2 | 171.1 | 1 | 1 | 10 | 25 | 12 | 15 | 30 |
| 13-HODE (295/195) | 295.2 | 195.1 | 1 | 1 | 10 | 25 | 12 | 15.02 | 30 |
| 13-OxoODE (13-KODE) (293/113) | 293.2 | 113.2 | 1 | 1 | 10 | 30 | 12 | 14.84 | 30 |
| 12(13)-EpOME (295/195 | 295.3 | 195.2 | 1 | 1 | 10 | 25 | 12 | 16 | 30 |
| 9,10 DiHOME (313/201) | 313.3 | 201.3 | 1 | 1 | 10 | 30 | 12 | 13 | 30 |
| 10-Nitrolinoleate (324/277) | 324.2 | 277.1 | 1 | 1 | 10 | 18 | 12 | 16.7 | 30 |
| 9(S)HOTrE (293/171) | 293.3 | 171.1 | 1 | 1 | 10 | 25 | 12 | 13.74 | 30 |
| 13(S)HOTrE (293/195) | 293.2 | 195 | 1 | 1 | 10 | 25 | 12 | 13.94 | 30 |
| PAF (508/59) | 508.3 | 59.1 | 1 | 1 | 10 | 20 | 12 | 17.8 | 30 |
|  |  |  |  |  |  |  |  |  |  |

**Supplementary Table 2. Positive Mode**

| **Compound ID** | **Q1** | **Q3** | **Edit Dwell** | **Dwell Time** | **EP** | **CE** | **CXP** | **Expected RT (min)** | **RT Tolerance (s)** |
| --- | --- | --- | --- | --- | --- | --- | --- | --- | --- |

| LTC4-d5 (631/194) | 631.3 | 194.1 | 1 | 1 | 9 | 28 | 15 | 11.5 | 30 |
| --- | --- | --- | --- | --- | --- | --- | --- | --- | --- |
| LTD4-d5 (502/194) | 502.3 | 194.1 | 1 | 1 | 9 | 28 | 13 | 10.2 | 30 |
| LTE4-d5 (445/194) | 445.2 | 194.1 | 1 | 1 | 9 | 23.5 | 13 | 12.32 | 30 |
| LTC4 (626/189) | 626.3 | 189.1 | 1 | 1 | 10 | 28 | 13 | 11.5 | 30 |
| LTD4 (497/189) | 497.3 | 189.1 | 1 | 1 | 10 | 23 | 13 | 10.22 | 30 |
| LTE4 (440/189) | 440.3 | 189.1 | 1 | 1 | 10 | 23 | 13 | 12.3 | 30 |
| MCTR1 (650/191) | 650.3 | 191.1 | 1 | 1 | 10 | 28 | 13 | 11.3 | 30 |
| MCTR2 (521/191) | 521.3 | 191.1 | 1 | 1 | 10 | 23 | 13 | 10.1 | 30 |
| MCTR3 (464/191) | 464.3 | 191.1 | 1 | 1 | 10 | 25 | 13 | 12.24 | 30 |
| PCTR1 (650/231) | 650.3 | 231.1 | 1 | 1 | 10 | 28 | 13 | 11.3 | 30 |
| PCTR2 (521/231) | 521.3 | 231.1 | 1 | 1 | 10 | 23 | 13 | 10.14 | 30 |
| PCTR3 (464/231) | 464.3 | 231.1 | 1 | 1 | 10 | 23 | 13 | 12.3 | 30 |
| PAF (524/184) | 524.3 | 183.9 | 1 | 1 | 10 | 20 | 13 | 17.8 | 30 |
| PGE2 Ethanolamide (PGE2-EA) (396/62) | 396.5 | 62.1 | 1 | 1 | 10 | 25 | 13 | 6 | 30 |
| Oleoyl Ethanolamide (OEA) (326/62) | 326.4 | 62.1 | 1 | 1 | 10 | 25 | 13 | 17.9 | 30 |
| Palmitoyl Ethanolamide (300/62) | 300.4 | 62.1 | 1 | 1 | 10 | 25 | 13 | 16.6 | 30 |
| Anandamide (AEA) (348/62) | 348.4 | 62.1 | 1 | 1 | 10 | 25 | 13 | 17.6 | 30 |
| Docosahexaenoyl Ethanolamide (DHEA) (372/62) | 372.4 | 62.1 | 1 | 1 | 10 | 25 | 13 | 17.7 | 30 |
| Linoleoyl Ethanolamide (LEA) (324/62) | 324.4 | 62.1 | 1 | 1 | 10 | 25 | 13 | 17.5 | 30 |
| Stearoyl Ethanolamide (ceramid) (328/62) | 328.4 | 62.1 | 1 | 1 | 10 | 25 | 13 | 18 | 30 |
| oxy-Arachidonoyl Ethanolamide (oxy-AEA) (364/62) | 364 | 62 | 1 | 1 | 10 | 25 | 13 | 14.5 | 30 |
| 2-Arachidonoyl Glycerol (2AG) (379/287) | 379.4 | 287.2 | 1 | 1 | 10 | 25 | 13 | 17.73 | 30 |
| Docosatetraenoyl Ethanolamide (DEA) (376/62) | 376.6 | 62.1 | 1 | 1 | 10 | 25 | 13 | 17.9 | 30 |
| alpha-linolenoyl ethanolamide (322/62) | 322.4 | 62.1 | 1 | 1 | 10 | 25 | 13 | 16.4 | 30 |
| oleamide (282/247) | 282.4 | 247.4 | 1 | 1 | 10 | 25 | 13 | 17.9 | 30 |
| dihomo-gamma-linolenoyl ethanolamide (350/62) | 350.4 | 62.1 | 1 | 1 | 10 | 25 | 13 | 17.8 | 30 |
| docosanoyl ethanolamide (384/62) | 384.5 | 62.1 | 1 | 1 | 10 | 25 | 13 | 19 | 30 |

**Supplementary Figure 1. There were no other changes to bone.** (A) There were no differences in subchondral bone thickness at 2 weeks post-DMM in male mice. There were no differences in female due to surgery or strain. B) Bone volume fraction (BV/TV) was not significantly different between strain, surgery, or sex in the proximal tibial epiphysis.

**Supplementary Figure 2. There were no differences in number of CGRP+ and TH+ nerve endings.** Preliminary analysis of (a) CGRP+ and (b) TH+ neurites showed no differences in between strain, sex, or surgery at the joint.

**Supplementary Figure 3. There are no correlations between osteophytes and pressure-pain threshold or static incapacitance.** (A) Spearman’s correlation between osteophytes and pressure-pain threshold. (B) Spearman’s correlation between osteophytes and offloading of the surgical limb. Spearman’s correlation coefficient (r) is reported. p-value > 0.05 is indicated in the graphs.

**Supplementary Figure 4. There are no correlations between synovitis and pressure-pain threshold or static incapacitance.** (A) Spearman’s correlation between synovitis and pressure-pain threshold. (B) Spearman’s correlation between synovitis and offloading of the surgical limb. Spearman’s correlation coefficient (r) is reported. p-value > 0.05 is indicated in the graphs.

**Supplementary Figure 5. Heat maps of targeted lipidomic profiles of *FD-/-* and WT DMM groups.** (A) 2 weeks and (B) 8 weeks post-DMM in male mice.

**Supplementary Figure 6. PLS-DA plot comparing strain and timepoint separated into four groups.** (A) Serum (B) Synovial fluid of male mice.

**Supplementary Figure 7. There are no correlations between pressure-pain threshold and abundances of significant eicosanoids.** (A) Serum at two weeks (B) Synovial fluid at two weeks (C) Serum at 8 weeks post-DMM. Spearman’s correlation coefficient (r) is reported.
